# Supplementary material for: Phase transition regulation and piezoelectric performance optimization of fresnoite crystals for high-temperature acceleration sensing
Source: Royal Society of Chemistry journal article supplement (doi:10.1039/d1tc03192a), 2021-11-15
Supplement: d1tc03192a1.pdf [file d1tc03192a1.pdf]

## Supporting Information

### Phase transition regulation and piezoelectric performance optimization of fresnoite crystal for high temperature acceleration sensing

Chao Jiang<sup>a</sup>, Caizi Zhang<sup>b</sup>, Fangfei Li<sup>b</sup>, Li Sun<sup>a</sup>, Yanlu Li<sup>a</sup>, Fapeng Yu<sup>a\*</sup>, and Xian Zhao<sup>a</sup>

<sup>a</sup> Key Laboratory of Laser & Infrared System, Ministry of Education, State Key Laboratory of Crystal Materials, Shandong University, Jinan, China

<sup>b</sup> State Key Laboratory of Superhard Materials, College of Physics, Jilin University, Changchun, China

Email addresses: [fapengyu@sdu.edu.cn](mailto:fapengyu@sdu.edu.cn)

**Table S1.** Atomic Coordinates and equivalent isotropic displacement parameters for Ba<sub>2-x</sub>Sr<sub>x</sub>TS crystals

**Table S2.** Chemical composition of grown Ba<sub>2-x</sub>Sr<sub>x</sub>TS crystal

**Table S3.** Thermal expansion coefficient for Ba<sub>2-x</sub>Sr<sub>x</sub>TS crystals

**Table S4.** Bond distances and bond valence sum for Ba<sub>2-x</sub>Sr<sub>x</sub>TS crystals

**Figure S1.** In- situ high temperature electron diffraction patterns collected from BTS single crystal sample

**Figure S2.** Piezoelectric coefficient  $d_{33}$  and lattice constants ratio  $c/a$  versus molar fraction of Sr

**Figure S3.** Impedance spectra and phase angles of thickness shear mode  $d_{15}$

**Figure S4.** Phase transition temperature and piezoelectric coefficient  $d_{15}$  as a function of molar fraction of Sr.

**Figure S5.** In-situ high temperature X-ray diffraction patterns of Ba<sub>2</sub>TiSi<sub>2</sub>O<sub>8</sub> (a) and Rietveld refined profile example of Ba<sub>2</sub>TiSi<sub>2</sub>O<sub>8</sub> at 50°C (b); In-situ high temperature X-ray diffraction patterns of Ba<sub>1.1</sub>Sr<sub>0.9</sub>TiSi<sub>2</sub>O<sub>8</sub> (c) and Rietveld refined profile example of Ba<sub>1.1</sub>Sr<sub>0.9</sub>TiSi<sub>2</sub>O<sub>8</sub> at 50°C (d)

**Table S1.** Atomic Coordinates and equivalent isotropic displacement parameters for Ba<sub>2-x</sub>Sr<sub>x</sub>TiSi<sub>2</sub>O<sub>8</sub> crystals

| Ba <sub>2</sub> TiSi <sub>2</sub> O <sub>8</sub> |           |           |            |                                                           |
|--------------------------------------------------|-----------|-----------|------------|-----------------------------------------------------------|
| Atom                                             | <i>x</i>  | <i>y</i>  | <i>z</i>   | <i>U</i> <sub>eq</sub> (Å <sup>2</sup> ×10 <sup>3</sup> ) |
| Ba1                                              | 0.8271(0) | 0.3271(0) | 0.0007(1)  | 12.33(17)                                                 |
| Ti1                                              | 0.5000    | 0.5000    | 0.5358(3)  | 9.6(3)                                                    |
| Si1                                              | 0.6280(1) | 0.1280(1) | 0.5141(6)  | 9.7(3)                                                    |
| O1                                               | 0.5759(7) | 0.2927(6) | 0.6445(10) | 24.9(10)                                                  |
| O2                                               | 0.6261(4) | 0.1261(4) | 0.2068(12) | 12.2(9)                                                   |
| O3                                               | 0.5000    | 0.0000    | 0.6390(19) | 24.8(19)                                                  |
| O4                                               | 0.5000    | 0.5000    | 0.2132(19) | 19.6(16)                                                  |

Symmetry operations: (#1) *x,y,z*; (#2) *-y,x,z*; (#3) *-x,-y,z*; (#4) *y,-x,z*; (#5) *1/2-x,1/2+y,z*; (#6) *1/2+x,1/2-y,z*; (#7) *1/2-y,1/2-x,z*; (#8) *1/2+y,1/2+x,z*

| Ba <sub>1.8</sub> Sr <sub>0.2</sub> TiSi <sub>2</sub> O <sub>8</sub> |            |            |            |                                                           |
|----------------------------------------------------------------------|------------|------------|------------|-----------------------------------------------------------|
| Atom                                                                 | <i>x</i>   | <i>y</i>   | <i>z</i>   | <i>U</i> <sub>eq</sub> (Å <sup>2</sup> ×10 <sup>3</sup> ) |
| Ba1                                                                  | 0.82712(2) | 0.32712(2) | 0.19339(8) | 14.23(9)                                                  |
| Sr1                                                                  | 0.82712(2) | 0.32712(2) | 0.19339(8) | 14.23(9)                                                  |
| Ti1                                                                  | 0.5000     | 0.5000     | 0.7274(2)  | 11.7(3)                                                   |
| Si1                                                                  | 0.62803(3) | 0.12803(3) | 0.7048(4)  | 11.7(2)                                                   |
| O1                                                                   | 0.5764(5)  | 0.2923(4)  | 0.8370(7)  | 29.8(8)                                                   |
| O2                                                                   | 0.6264(3)  | 0.1264(6)  | 0.3988(7)  | 14.9(6)                                                   |
| O3                                                                   | 0.5000     | 0.0000     | 0.8231(11) | 29.0(14)                                                  |
| O4                                                                   | 0.5000     | 0.5000     | 0.4024(19) | 22.4(11)                                                  |

Symmetry operations: (#1) *x,y,z*; (#2) *-x,-y,z*; (#3) *-y,x,z*; (#4) *y,-x,z*; (#5) *x+1/2,-y+1/2,z*; (#6) *-x+1/2,y+1/2,z*; (#7) *-y+1/2,-x+1/2,z*; (#8) *y+1/2,x+1/2,z*

| Ba <sub>1.6</sub> Sr <sub>0.4</sub> TiSi <sub>2</sub> O <sub>8</sub> |            |            |            |                                                           |
|----------------------------------------------------------------------|------------|------------|------------|-----------------------------------------------------------|
| Atom                                                                 | <i>x</i>   | <i>y</i>   | <i>z</i>   | <i>U</i> <sub>eq</sub> (Å <sup>2</sup> ×10 <sup>3</sup> ) |
| Ba1                                                                  | 0.17286(2) | 0.67286(2) | 0.99873(7) | 13.96(10)                                                 |

|     |             |             |            |           |
|-----|-------------|-------------|------------|-----------|
| Sr1 | 0.17286(2)  | 0.67286(2)  | 0.99873(7) | 13.96(10) |
| Ti1 | 0.5000      | 0.5000      | 0.4657(2)  | 12.6(2)   |
| Si1 | 0.37192(11) | 0.87192(11) | 0.4886(4)  | 13.0(2)   |
| O1  | 0.4240(6)   | 0.7074(4)   | 0.3555(7)  | 34.2(10)  |
| O2  | 0.3739(4)   | 0.8739(6)   | 0.7958(8)  | 16.4(7)   |
| O3  | 0.5000      | 1.0000      | 0.3689(12) | 34.6(19)  |
| O4  | 0.5000      | 0.5000      | 0.7918(12) | 23.7(13)  |

Symmetry operations: (#1)  $x,y,z$ ; (#2)  $-x,-y,z$ ; (#3)  $x+1/2,-y+1/2,z$ ; (#4)  $-x+1/2,y+1/2,z$ ; (#5)  $-y,x,z$ ; (#6)  $y,-x,z$ ; (#7)  $y+1/2,x+1/2,z$ ; (#8)  $-y+1/2,-x+1/2,z$

| Ba <sub>1.4</sub> Sr <sub>0.6</sub> TiSi <sub>2</sub> O <sub>8</sub> |            |            |             |                                             |
|----------------------------------------------------------------------|------------|------------|-------------|---------------------------------------------|
| Atom                                                                 | $x$        | $y$        | $z$         | $U_{eq}$ (Å <sup>2</sup> ×10 <sup>3</sup> ) |
| Ba1                                                                  | 0.32706(7) | 0.82706(7) | 0.00096(15) | 19.0(6)                                     |
| Sr1                                                                  | 0.32706(7) | 0.82706(7) | 0.00096(15) | 19.0(6)                                     |
| Ti1                                                                  | 0.50000    | 0.50000    | 0.5331(9)   | 16.5(10)                                    |
| Si1                                                                  | 0.1281(3)  | 0.6281(3)  | 0.5100(7)   | 17.7(9)                                     |
| O1                                                                   | 0.0000     | 0.5000     | 0.629(3)    | 44.0(6)                                     |
| O2                                                                   | 0.1264 (7) | 0.6264(9)  | 0.203(3)    | 19.0(2)                                     |
| O3                                                                   | 0.2920(15) | 0.5759(17) | 0.644(2)    | 43.0(16)                                    |
| O4                                                                   | 0.50000    | 0.50000    | 0.206(5)    | 38.0(5)                                     |

Symmetry operations: (#1)  $x,y,z$ ; (#2)  $-y,x,z$ ; (#3)  $-x,-y,z$ ; (#4)  $y,-x,z$ ; (#5)  $-x+1/2,y+1/2,z$ ; (#6)  $x+1/2,-y+1/2,z$ ; (#7)  $-y+1/2,-x+1/2,z$ ; (#8)  $y+1/2,x+1/2,z$

**Table S2.** Chemical composition of grown Ba<sub>2-x</sub>Sr<sub>x</sub>TS crystal

|       |     | Measured value | Theoretical value |
|-------|-----|----------------|-------------------|
| X=0.2 | BaO | 57.670%        | 55.558%           |
|       | SrO | 3.923%         | 4.172%            |
| X=0.4 | BaO | 50.891%        | 49.385%           |
|       | SrO | 8.219%         | 8.344%            |
| X=0.6 | BaO | 43.485%        | 43.212%           |

|     |         |         |
|-----|---------|---------|
| SrO | 12.434% | 12.515% |
|-----|---------|---------|

**Table S3.** Thermal expansion coefficient for Ba<sub>2-x</sub>Sr<sub>x</sub>TS crystals

| Unit (10 <sup>-6</sup> K <sup>-1</sup> ) | Before phase transition |      | After phase transition |       |
|------------------------------------------|-------------------------|------|------------------------|-------|
|                                          | X                       | Z    | X                      | Z     |
| x=0                                      | 7.96                    | 2.30 | 7.98                   | 15.0  |
| x=0.2                                    | 8.54                    | 3.66 | 8.58                   | 13.14 |
| x=0.4                                    | 7.78                    | 4.59 | 8.99                   | 13.07 |
| x=0.6                                    | 8.39                    | 4.74 | 8.00                   | 12.48 |

**Table S4.** Bond distances and bond valence sum for Ba<sub>2-x</sub>Sr<sub>x</sub>TS crystals

| Ba <sub>2</sub> TiSi <sub>2</sub> O <sub>8</sub>                     |       |        |       |        |       |
|----------------------------------------------------------------------|-------|--------|-------|--------|-------|
| Ba-O1                                                                | 2.993 | Ti1-O1 | 1.963 | Si1-O1 | 1.620 |
| Ba-O1                                                                | 2.993 | Ti1-O1 | 1.963 | Si1-O1 | 1.620 |
| Ba-O1                                                                | 2.845 | Ti1-O1 | 1.963 | Si1-O2 | 1.599 |
| Ba-O1                                                                | 2.845 | Ti1-O1 | 1.963 | Si1-O3 | 1.657 |
| Ba-O2                                                                | 2.791 | Ti1-O4 | 1.678 |        |       |
| Ba-O2                                                                | 2.791 |        |       |        |       |
| Ba-O2                                                                | 2.647 |        |       |        |       |
| Ba-O3                                                                | 2.835 |        |       |        |       |
| 1.8469                                                               |       | 4.1294 |       | 4.0063 |       |
| Ba <sub>1.8</sub> Sr <sub>0.2</sub> TiSi <sub>2</sub> O <sub>8</sub> |       |        |       |        |       |

|        |       |        |       |        |       |        |       |
|--------|-------|--------|-------|--------|-------|--------|-------|
| Ba-O1  | 2.838 | Sr-O1  | 2.838 | Ti1-O1 | 1.964 | Si1-O1 | 1.617 |
| Ba-O1  | 2.838 | Sr -O1 | 2.838 | Ti1-O1 | 1.964 | Si1-O1 | 1.617 |
| Ba-O1  | 2.990 | Sr -O1 | 2.990 | Ti1-O1 | 1.964 | Si1-O2 | 1.588 |
| Ba-O1  | 2.990 | Sr -O1 | 2.990 | Ti1-O1 | 1.964 | Si1-O3 | 1.657 |
| Ba-O2  | 2.637 | Sr -O2 | 2.637 | Ti1-O4 | 1.687 |        |       |
| Ba-O2  | 2.786 | Sr -O2 | 2.786 |        |       |        |       |
| Ba-O2  | 2.786 | Sr -O2 | 2.786 |        |       |        |       |
| Ba-O3  | 2.830 | Sr -O3 | 2.830 |        |       |        |       |
| 1.8780 |       | 1.1959 |       | 4.0874 |       | 4.0551 |       |

| Ba <sub>1.6</sub> Sr <sub>0.4</sub> TiSi <sub>2</sub> O <sub>8</sub> |       |        |       |        |       |        |       |
|----------------------------------------------------------------------|-------|--------|-------|--------|-------|--------|-------|
| Ba-O1                                                                | 2.837 | Sr-O1  | 2.837 | Ti1-O1 | 1.961 | Si1-O1 | 1.619 |
| Ba-O1                                                                | 2.837 | Sr -O1 | 2.837 | Ti1-O1 | 1.961 | Si1-O1 | 1.619 |
| Ba-O1                                                                | 2.985 | Sr -O1 | 2.985 | Ti1-O1 | 1.961 | Si1-O2 | 1.591 |
| Ba-O1                                                                | 2.985 | Sr -O1 | 2.985 | Ti1-O1 | 1.961 | Si1-O3 | 1.658 |
| Ba-O2                                                                | 2.776 | Sr -O2 | 2.776 | Ti1-O4 | 1.689 |        |       |
| Ba-O2                                                                | 2.776 | Sr -O2 | 2.776 |        |       |        |       |
| Ba-O2                                                                | 2.632 | Sr -O2 | 2.632 |        |       |        |       |
| Ba-O3                                                                | 2.825 | Sr -O3 | 2.825 |        |       |        |       |
| 1.9058                                                               |       | 1.2138 |       | 4.1015 |       | 4.0327 |       |

| Ba <sub>1.4</sub> Sr <sub>0.6</sub> TiSi <sub>2</sub> O <sub>8</sub> |       |        |       |        |       |        |       |
|----------------------------------------------------------------------|-------|--------|-------|--------|-------|--------|-------|
| Ba-O1                                                                | 2.833 | Sr-O1  | 2.833 | Ti1-O1 | 1.972 | Si1-O1 | 1.622 |
| Ba-O1                                                                | 2.833 | Sr -O1 | 2.833 | Ti1-O1 | 1.972 | Si1-O1 | 1.622 |
| Ba-O1                                                                | 2.979 | Sr -O1 | 2.979 | Ti1-O1 | 1.972 | Si1-O2 | 1.598 |
| Ba-O1                                                                | 2.979 | Sr -O1 | 2.979 | Ti1-O1 | 1.972 | Si1-O3 | 1.662 |
| Ba-O2                                                                | 2.773 | Sr -O2 | 2.773 | Ti1-O4 | 1.70  |        |       |
| Ba-O2                                                                | 2.773 | Sr -O2 | 2.773 |        |       |        |       |
| Ba-O2                                                                | 2.623 | Sr -O2 | 2.623 |        |       |        |       |

|        |        |         |        |
|--------|--------|---------|--------|
| Ba-O3  | 2.828  | Sr -O3  | 2.828  |
| 1.9277 | 1.2275 | 3.98138 | 3.9860 |

The phase transition for BTS crystal was characterized taking advantage of the in-situ high temperature TEM tests. In-situ high temperature transmission electron microscope (TEM) was conducted using a Titan Cubed Themis G2-300 (FEI) with a condenser spherical aberration corrector operating at an accelerating voltage of 200 kV. The BTS crystal sample was prepared by Focused Ion beam (FIB) using Helios NanoLab 460HP (FEI) and the diffraction patterns were recorded along  $[2\bar{1}0]$ -orientation.

Results are shown in Figure S1, where obvious satellite reflections are observed at room temperature. The appearance of satellite reflections in the electron diffraction pattern proves that the BTS crystal is an incommensurate phase at room temperature. When the temperature rising up to 150°C, the intensity of the satellite reflections gradually weakens and disappears completely prior to 200°C, only the main reflection points can be observed, indicating the BTS crystal is a normal phase at high temperature above 150°C. Based on the in-situ high temperature TEM results, it can be confirmed that the phase transition type of the BTS crystal in the vicinity of 150°C is “incommensurate phase-normal phase transition”.

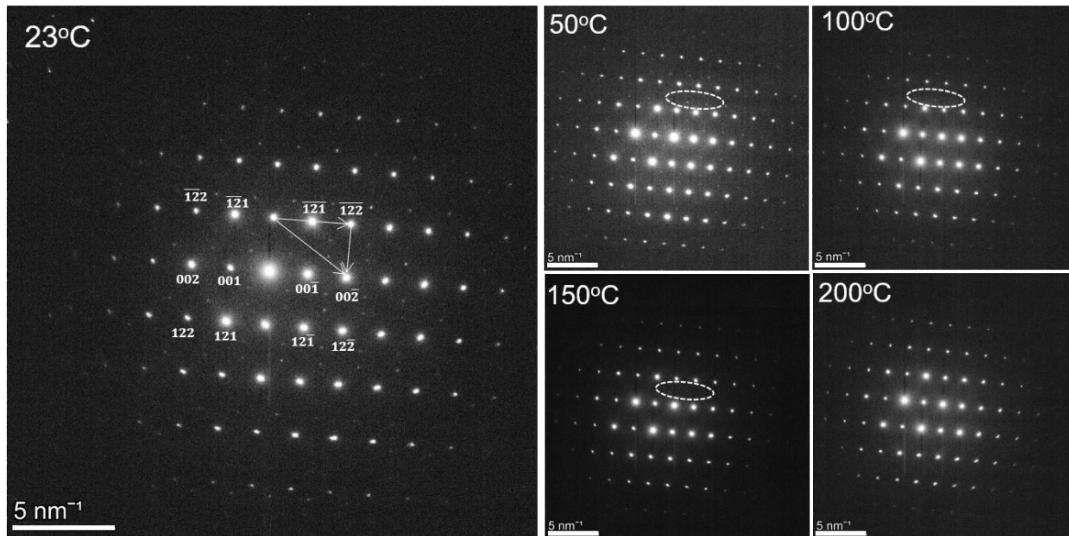

Figure S1. In- situ high temperature electron diffraction patterns collected from BTS

single crystal sample

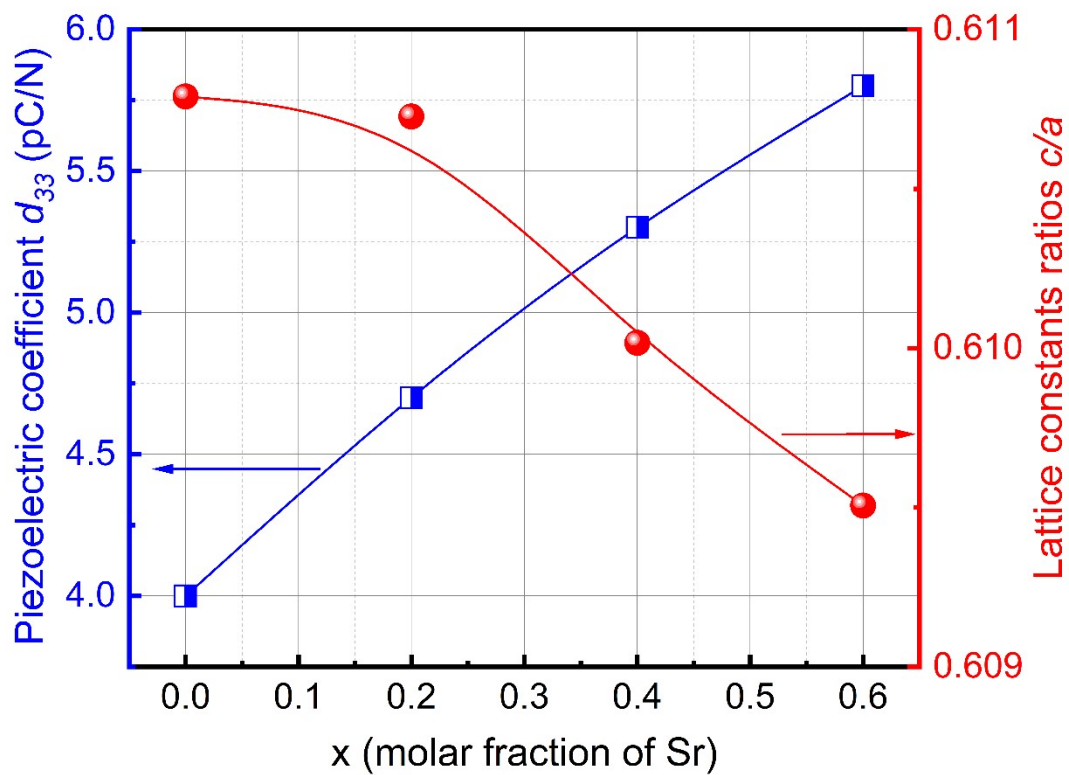

Figure S2. Piezoelectric coefficient  $d_{33}$  and lattice constants ratio  $c/a$  versus molar fraction

of Sr

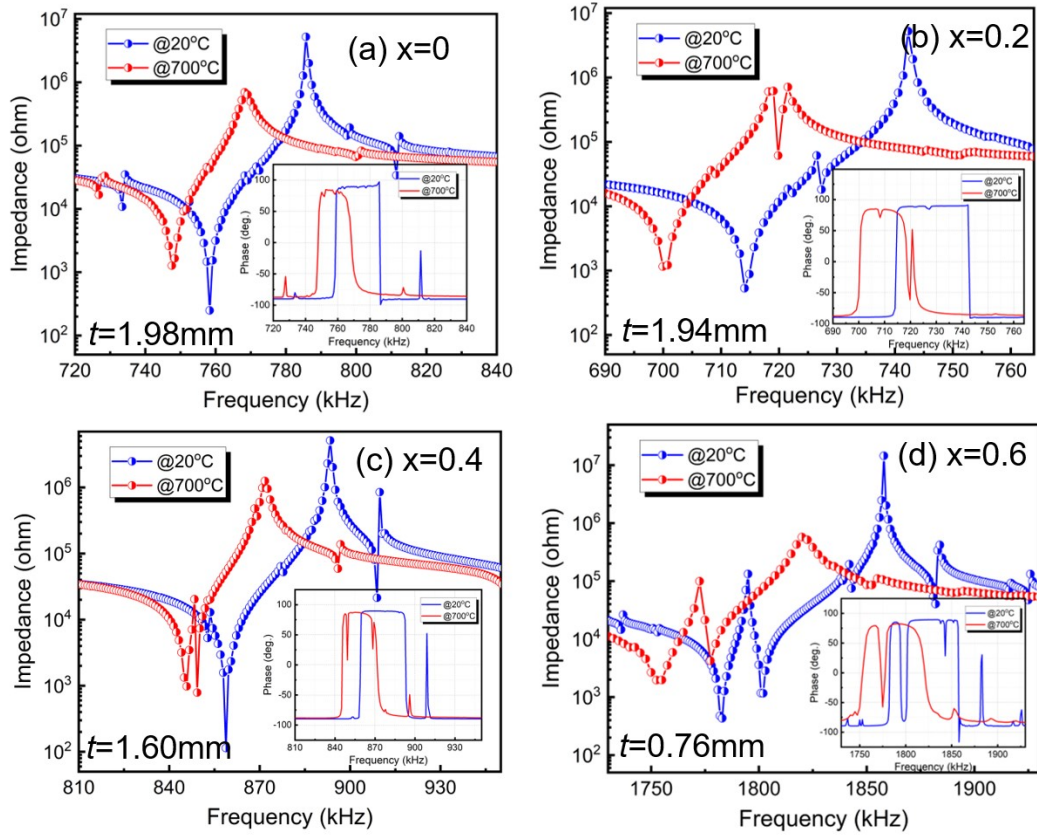

Figure S3. Impedance spectra and phase angles of thickness shear mode  $d_{15}$ .

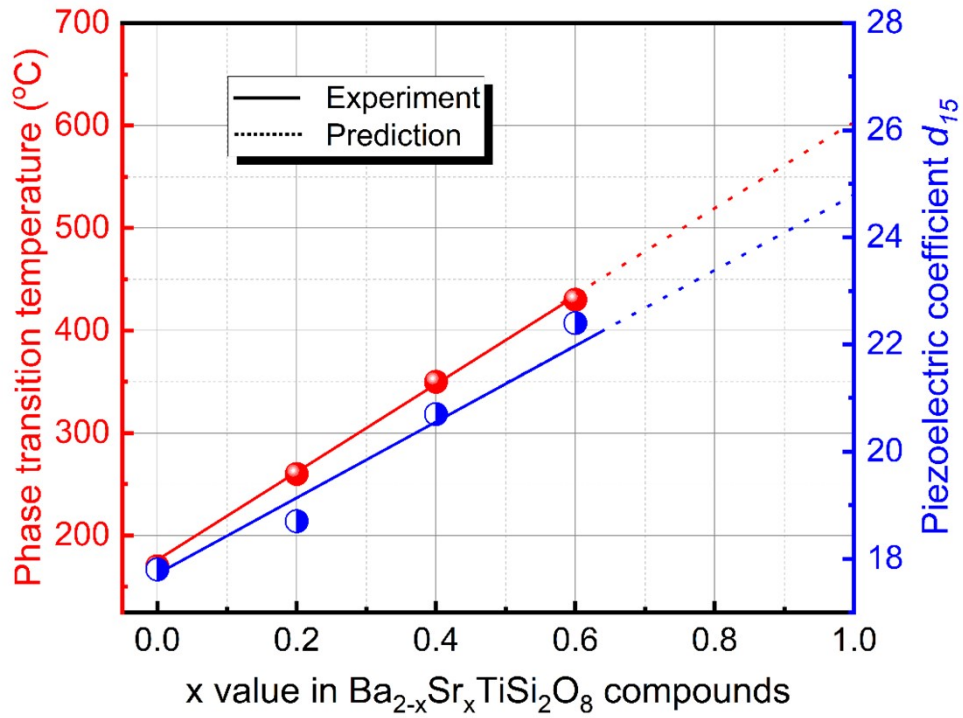

Figure S4. Phase transition temperature and piezoelectric coefficient  $d_{15}$  as a function of molar fraction of Sr.



The polycrystalline were checked by X-ray diffraction (XRD) pattern using the Rigaku X-ray diffractometer (Rigaku, The Woodlands, TX) with CuK $\alpha$  radiation ( $\lambda=1.5418\text{\AA}$ ) and nickel filter in a wide range of  $2\theta$  from  $15^\circ$  to  $80^\circ$  with a scanning rate of  $2^\circ \text{ min}^{-1}$ . The instrument was calibrated using the pure silicon sample provided with the instrument. The lattice parameters and other detailed structural information were obtained by the Rietveld refinement Fullprof program using a pseudo-Voigt function. The Rietveld refined profiles are shown in figure S4, where the observed pattern is consistent with the calculated pattern using the Rietveld analysis. It is noticed that a minor peak was observed at  $2\theta=32.34^\circ$  for  $x=0.9$  component, which matches the highest intensity peak of SrTiO $_3$ , (JCPDF No: #35-0734).

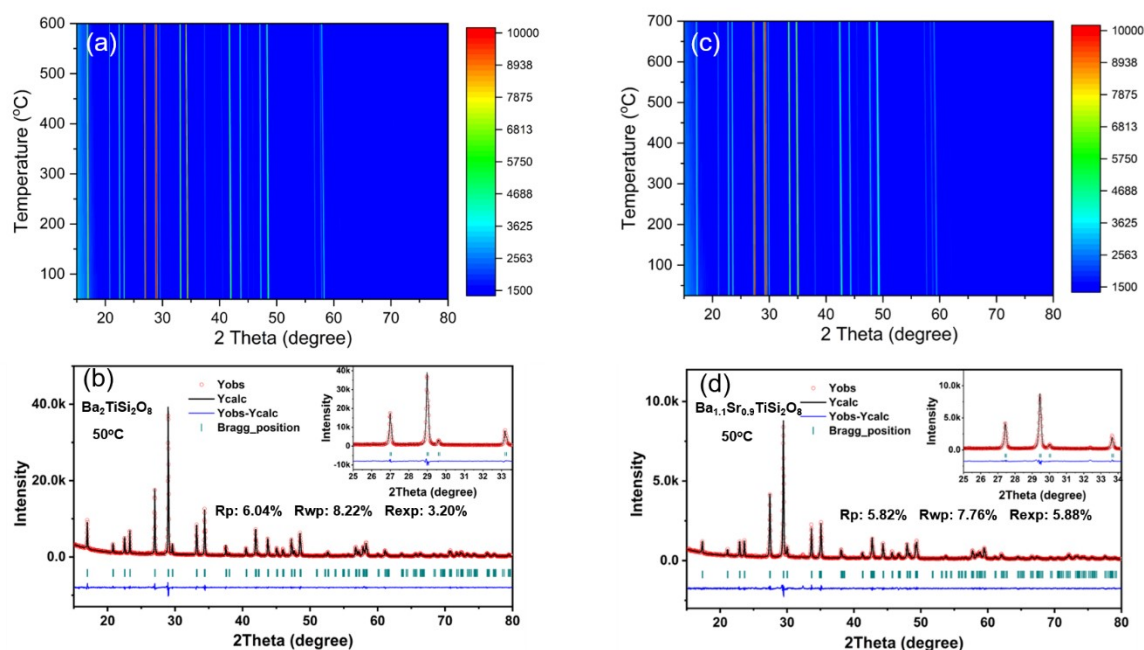

Figure S5. In-situ high temperature X-ray diffraction patterns of  $\text{Ba}_2\text{TiSi}_2\text{O}_8$  (a) and Rietveld refined profile example of  $\text{Ba}_2\text{TiSi}_2\text{O}_8$  at  $50^\circ\text{C}$  (b); In-situ high temperature X-ray diffraction patterns of  $\text{Ba}_{1.1}\text{Sr}_{0.9}\text{TiSi}_2\text{O}_8$  (c) and Rietveld refined profile example of  $\text{Ba}_{1.1}\text{Sr}_{0.9}\text{TiSi}_2\text{O}_8$  at  $50^\circ\text{C}$  (d)
